# Supplementary material
Source: PubMed Central journal article supplement (PMC7302431)
Supplement: NIHMS1595998-supplement-SFig1.pdf [file NIHMS1595998-supplement-SFig1.pdf]

# Supplementary Figure 1

**A**

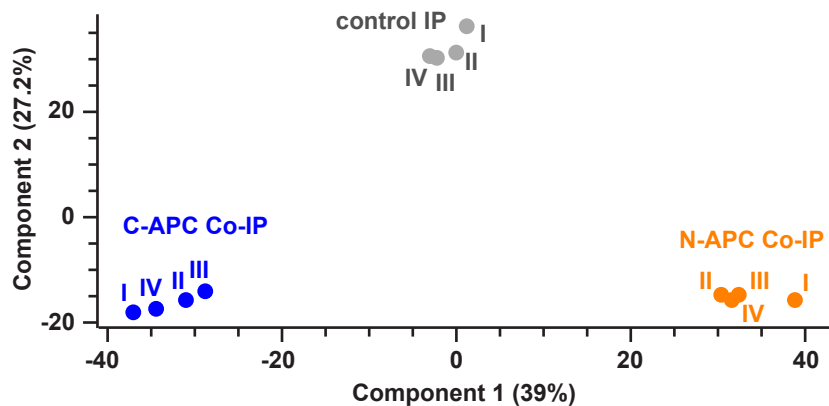

**D**

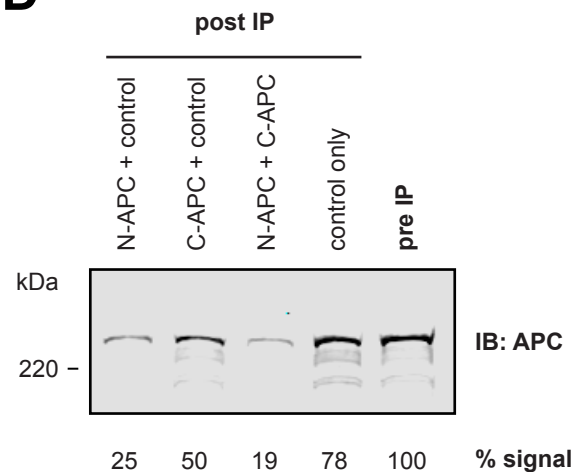

**B**

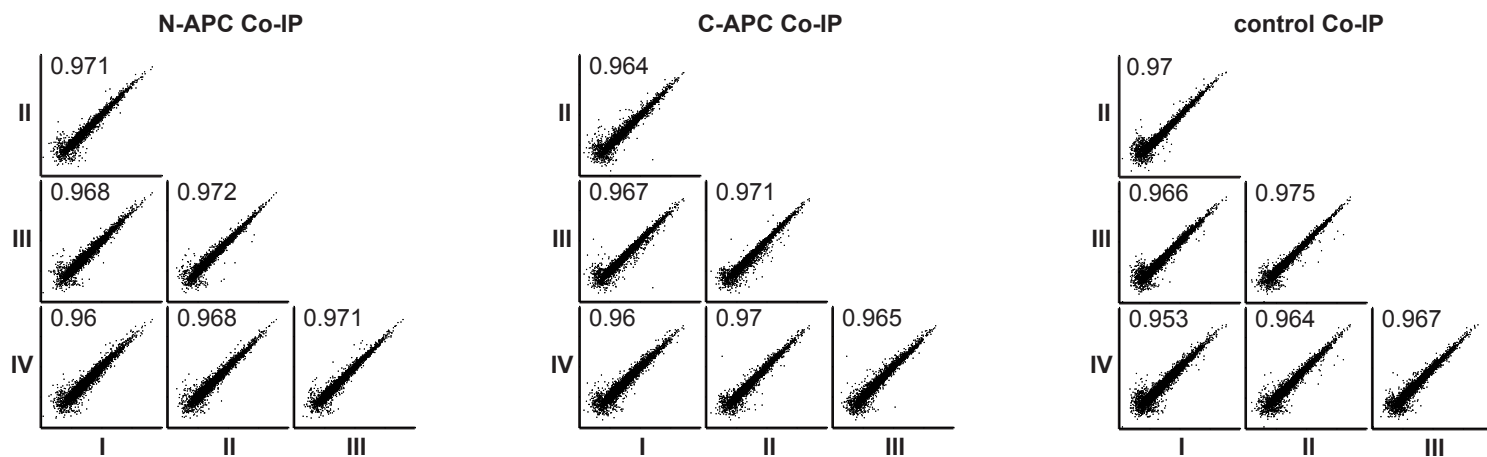

**C**

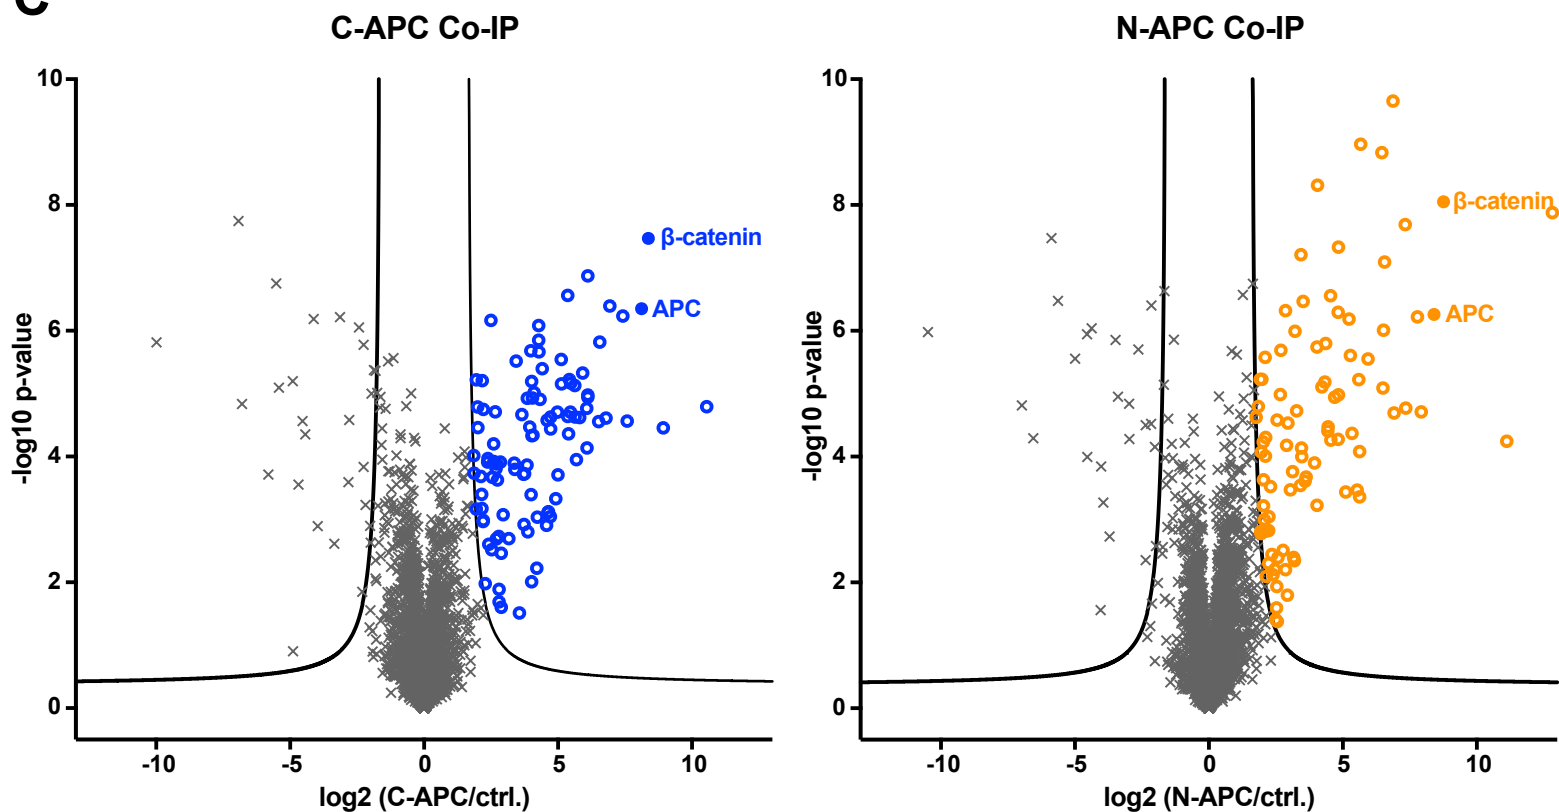

**Supplementary Figure 1. A** Projections – Principal component analysis of N-APC, C-APC and control Co-IP samples. **B** LFQ intensities for all measured proteins in respective replicates plotted against each other. The Pearson correlation coefficient is indicated for each comparison. **C** Volcano plots of proteins measured in C- and N-APC Co-IPs, respectively. Plotted is the log<sub>2</sub> fold change in mean LFQ intensities between specific APC IP and control IP (x-axis) against the –log p value obtained by Student's t-test (y-axis). Significant enrichment in specific APC IP vs. control IP (shown as colored circles, C-APC Co-IP= 101, N-APC Co-IP= 91) was determined by two-sided t-test with permutation-based FDR <0.01 and s<sub>0</sub> = 2 used for truncation (black line). **D** Levels of APC protein present in HeLa cell lysates after immunoprecipitation (post-IP) compared to protein levels before IP (pre-IP) using ~28 mg protein/IP (this is equivalent to the amounts used for the APC AE-MS experiment). The pool of APC immunoprecipitated by C-APC antibody (50% of total APC) overlapped with but was not equivalent to the APC pool immunoprecipitated by N-APC antibody (75% of total APC), as both antibodies together immunoprecipitated over 80% of total APC protein.
