# Supplementary material
Source: PubMed Central journal article supplement (PMC7302431)
Supplement: NIHMS1595998-supplement-SFig2.pdf [file NIHMS1595998-supplement-SFig2.pdf]

## Supplementary Figure 2

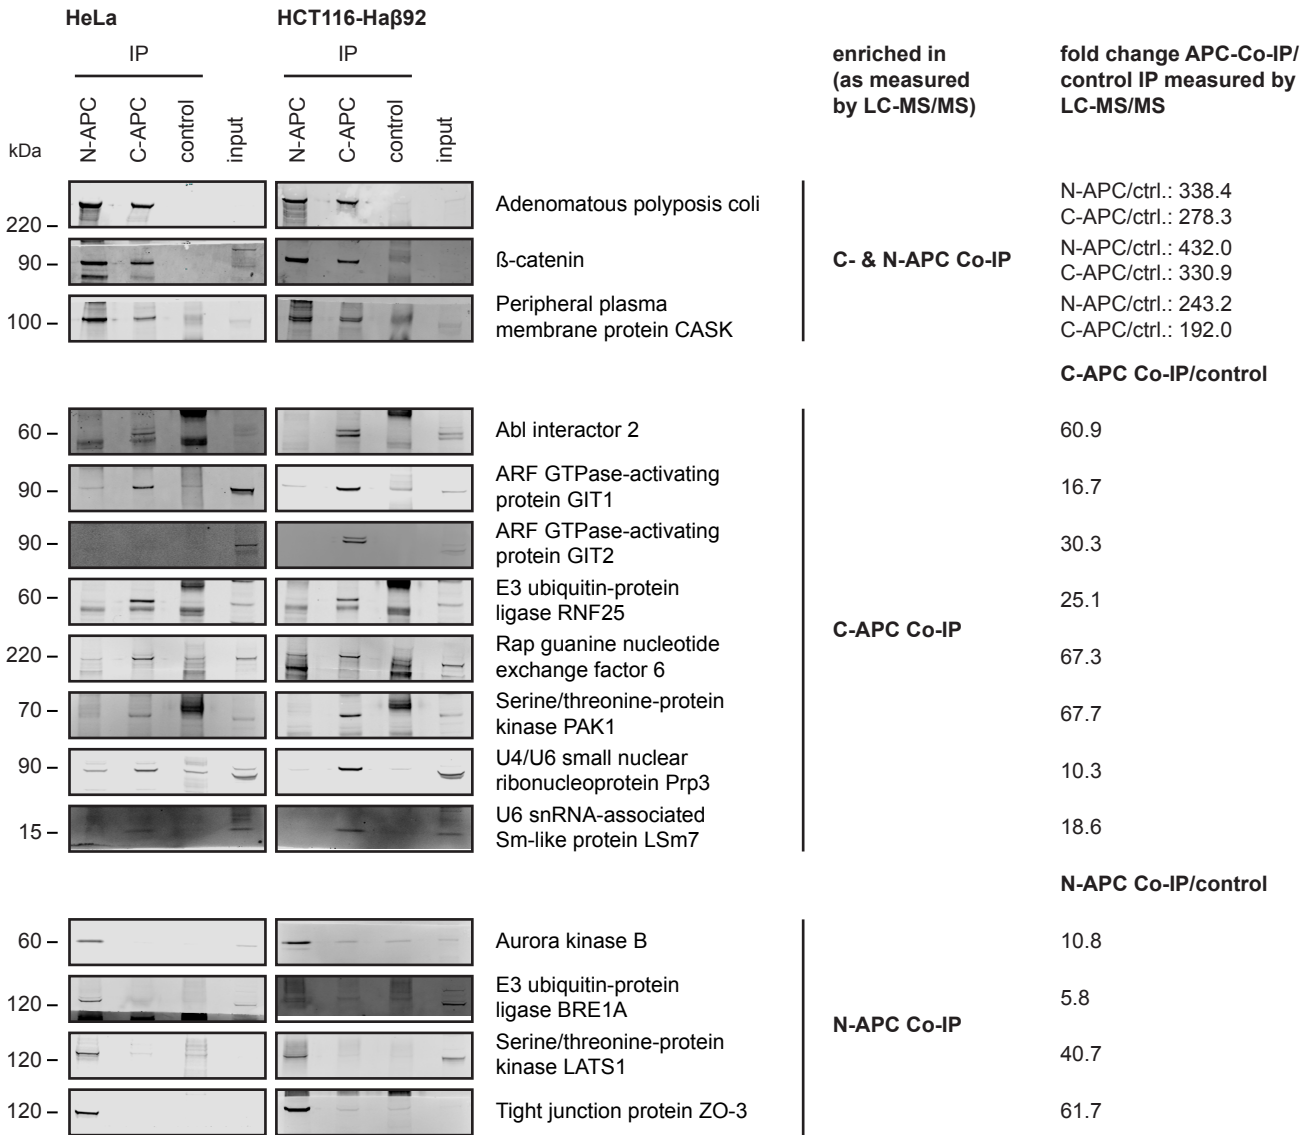

**Supplementary Figure S2.** APC interactors identified by AE-MS were validated in HeLa and HCT116-Haβ92 cells by Co-IP and WB. Input lanes: 50 μg protein.
