# Supplementary material
Source: PubMed Central journal article supplement (PMC7302431)
Supplement: NIHMS1595998-supplement-SFig3.pdf [file NIHMS1595998-supplement-SFig3.pdf]

# Supplementary Figure 3

## A

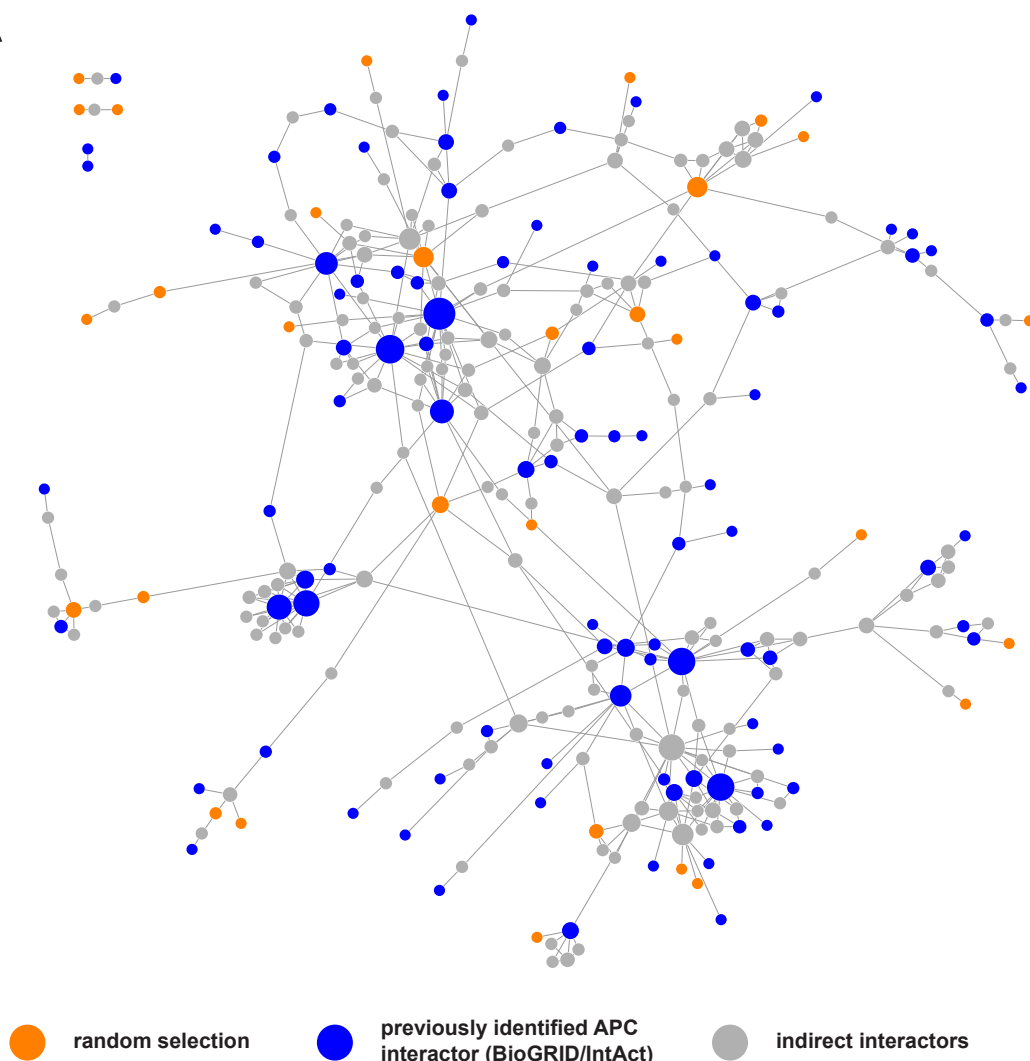

## B

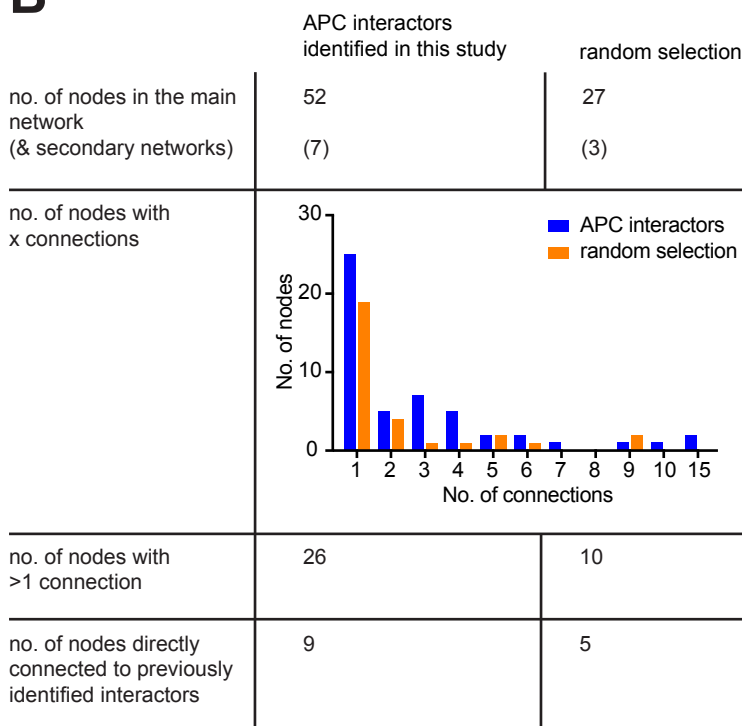

**Supplementary Figure 3. A** Network integrating known APC binding partners (blue), random selection (orange), and indirect interactors (grey). **B** Degree of integration into a network of known APC interactors between APC-binding proteins identified here, and the random selection in A.
