# Supplementary material
Source: PubMed Central journal article supplement (PMC7302431)
Supplement: NIHMS1595998-supplement-SFig4.pdf [file NIHMS1595998-supplement-SFig4.pdf]

# Supplementary Figure 4

**Ai**

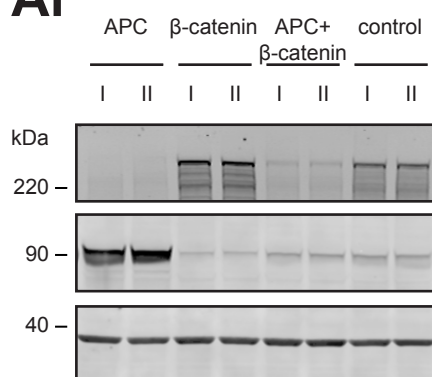

**Aii**

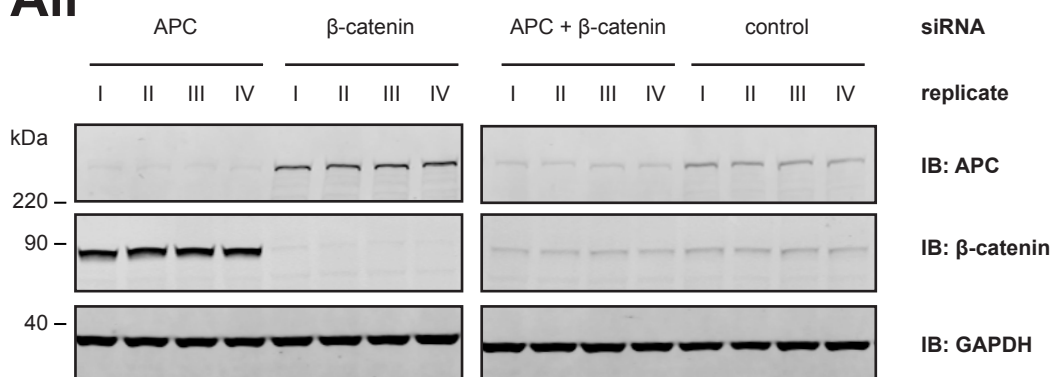

**Bi**

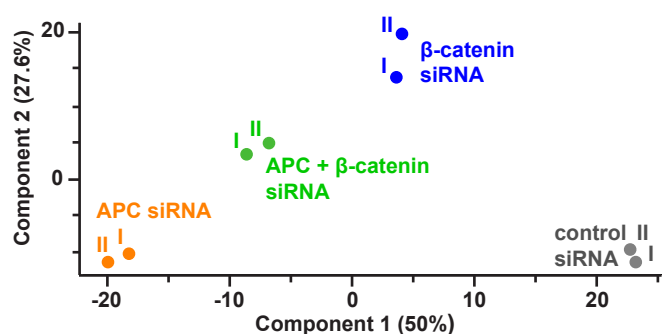

**Bii**

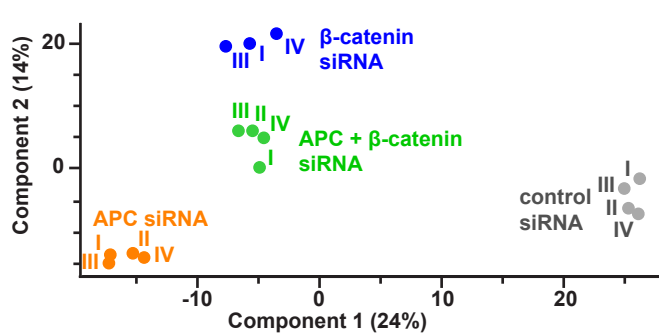

**Ci**

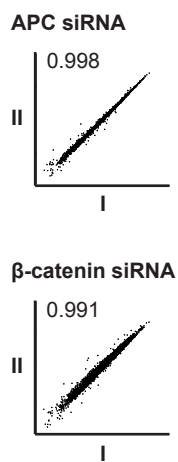

**Cii**

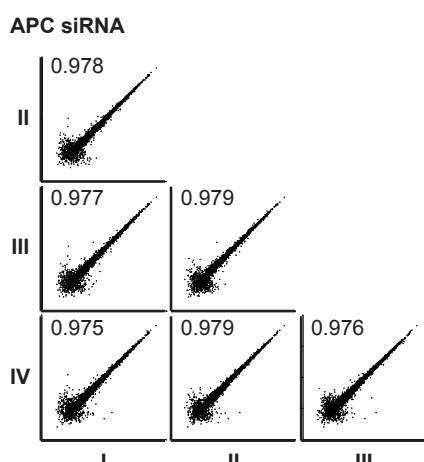

**β-catenin siRNA**

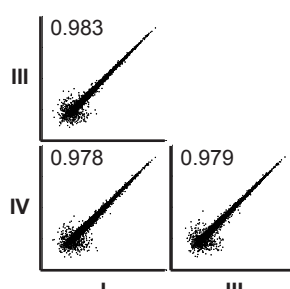

**APC+β-catenin siRNA**

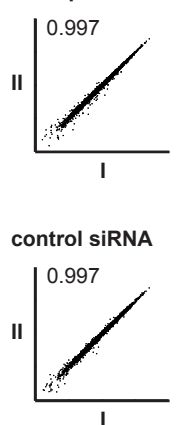

**APC+β-catenin siRNA**

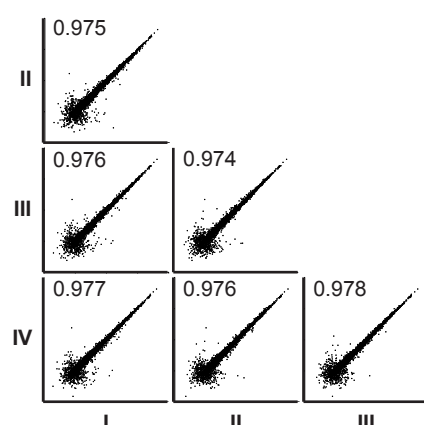

**control siRNA**

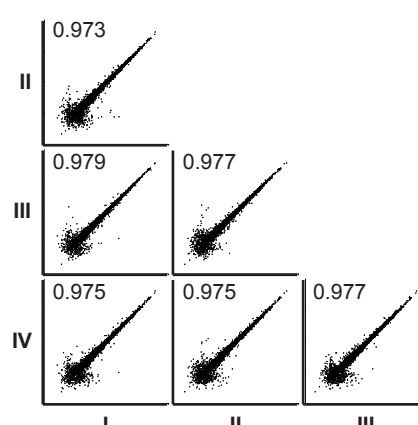

**D**

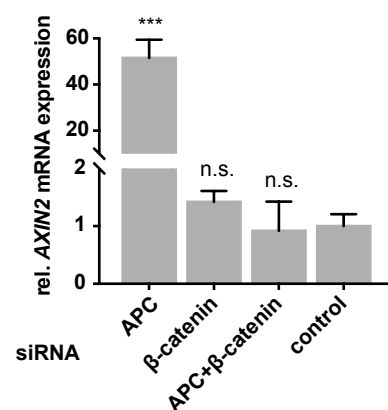

**Supplementary Figure 4. A** Confirmation of efficient siRNA knockdown in MS samples by WB. Transfections were performed in duplicate for TMT (**Ai**) and in quadruplicate for label-free (**Aii**). Note, WB panels shown in Aii are also shown in Supplementary Figure S5Di (72 h post transfection time point). **B** Projections - PCA of samples analyzed by TMT (**Bi**) and label-free (**Bii**) MS. **Ci** TMT MS, **Cii** label-free MS. Sum TMT intensities/LFQ intensities for all measured proteins in respective replicates are plotted against each other. The Pearson correlation coefficient is indicated for each comparison. Replicate II of the label-free  $\beta$ -catenin siRNA-treated sample was lost during sample processing. **D** mRNA expression of the  $\beta$ -catenin target gene AXIN2 analyzed by RT-qPCR. Indicated are mean expression levels relative to ACTB expression with SD from four independent transfections. Significance determined by one-way ANOVA followed by Dunnett's multiple comparison test; p value: \*\*\* < 0.001. Note, this data is also shown in Figure 6A.
