# Supplementary material
Source: PubMed Central journal article supplement (PMC7302431)
Supplement: NIHMS1595998-supplement-SFig5.pdf [file NIHMS1595998-supplement-SFig5.pdf]

# Supplementary Figure 5

## A

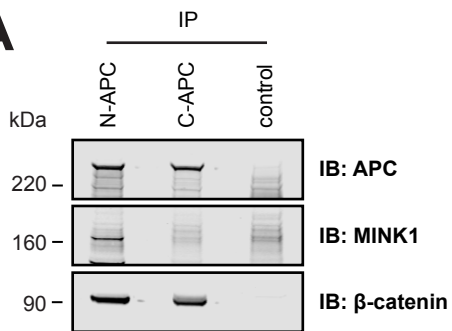

## Bi

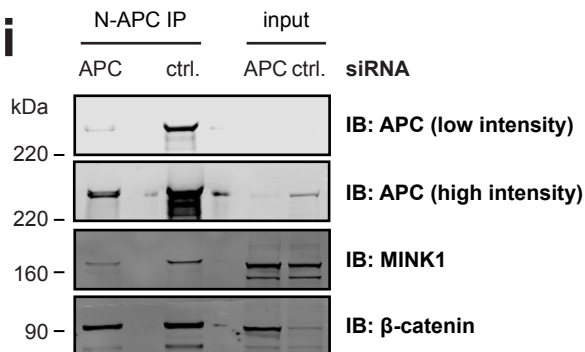

## Bii

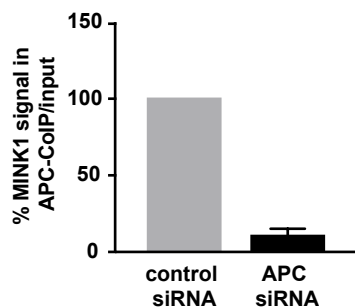

## C

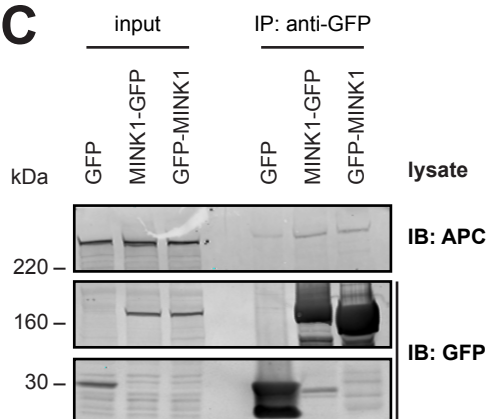

## Di

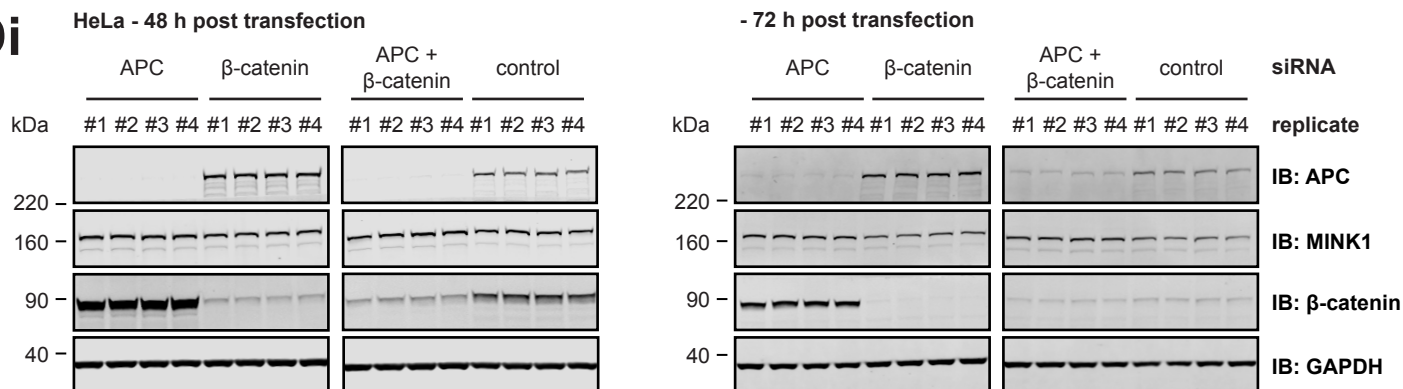

## Dii

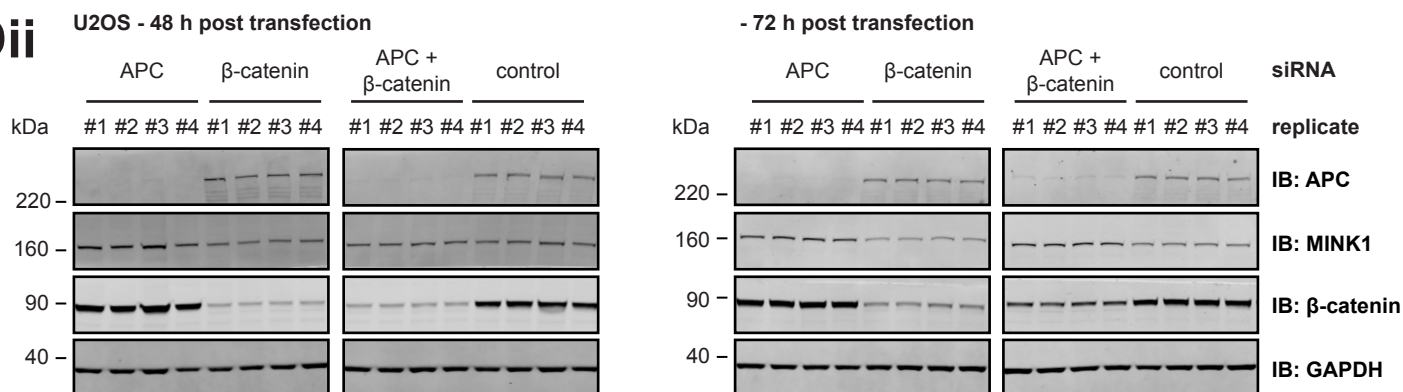

## Ei

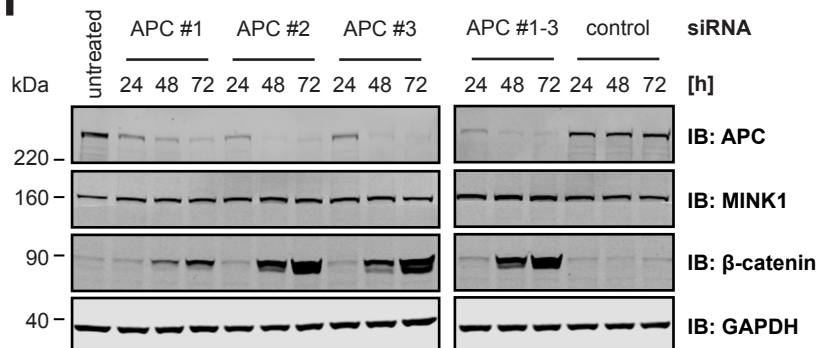

## Eii

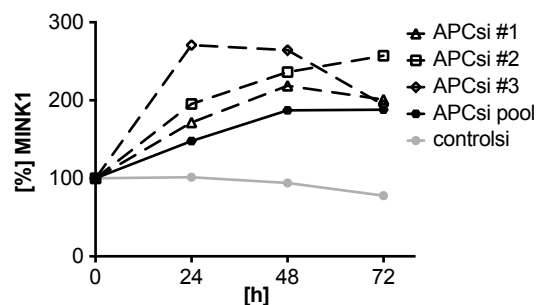

**Supplementary Figure 5. A** Co-IP of MINK1 with full-length, endogenous APC in N-APC but not C-APC IPs in U2OS cells. **Bi** APC Co-IPs in HeLa cells transfected with APC and control siRNA, respectively, confirming a specific interaction between MINK1 and APC. **Bii** Quantification of MINK1 WB signal in N-APC IP vs. input samples from control and APC siRNA treated cells. Shown are the mean and SD from two independent experiments. **C** Co-IP of APC with N- and C-terminally GFP-tagged MINK1 in U2OS cells. **D** Measurements of MINK1 proteins levels in response to siRNA-mediated depletion of APC and/or  $\beta$ -catenin in HeLa (i) and U2OS (ii) cells. Note, HeLa 72 h post transfection samples were also used for label-free total proteome measurements. WB panels for APC,  $\beta$ -catenin, and GAPDH are also shown in Supplementary Figure S4Aii. **Ei** Measurement of MINK1 protein levels in HeLa cells transfected with individual APC siRNAs (APC siRNA #1, #2, #3), a combination of these, or control siRNA. **Eii** Quantification of MINK1 WB signal in Ci, levels are indicated relative to un-transfected sample.
