# Supplementary material
Source: PubMed Central journal article supplement (PMC7302431)
Supplement: NIHMS1595998-supplement-SFig6.pdf [file NIHMS1595998-supplement-SFig6.pdf]

# Supplementary Figure 6

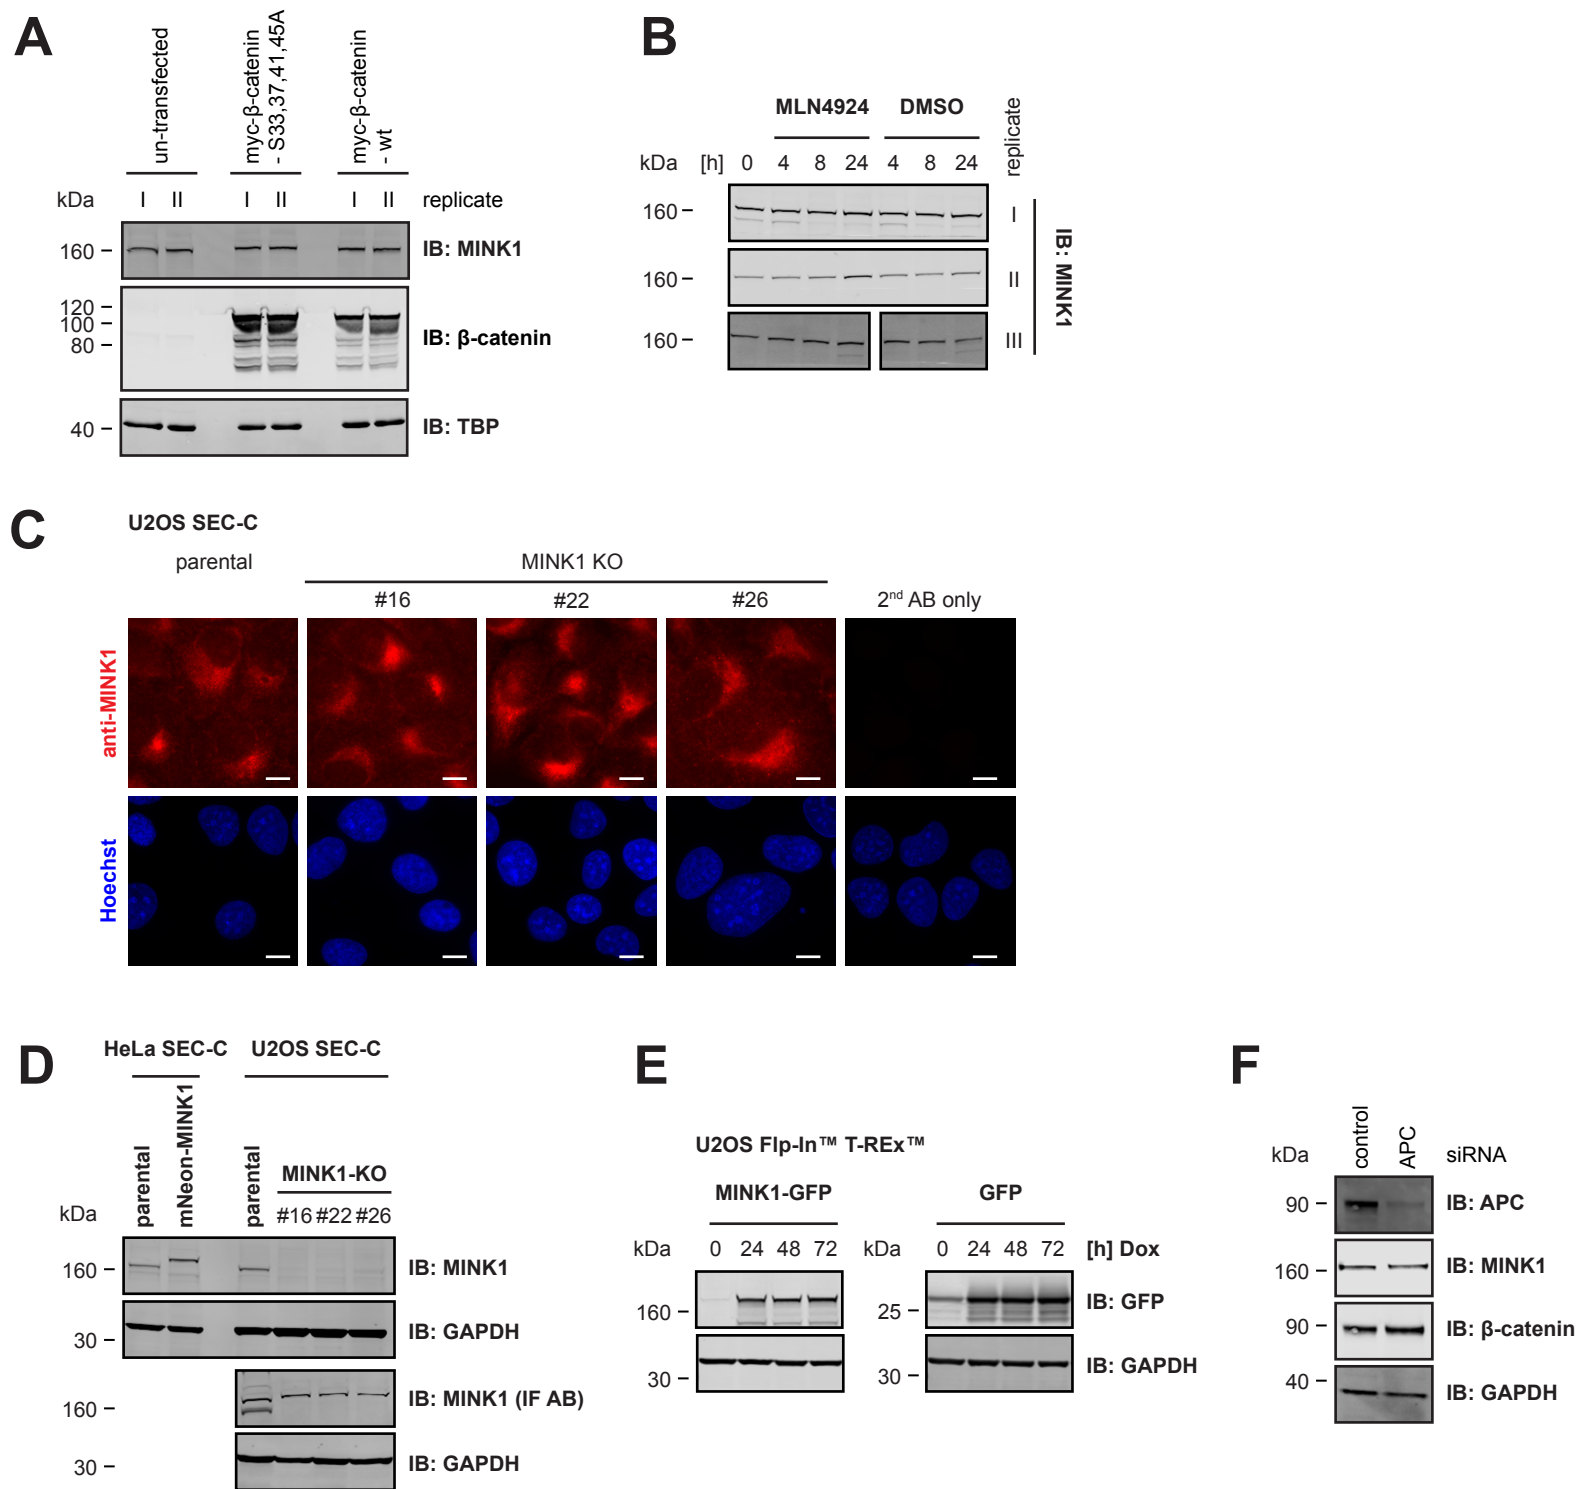

**Supplementary Figure 6. A** MINK1 protein levels in HeLa cells 48 h after transient over-expression with myc-tagged wild-type (wt) or constitutively active  $\beta$ -catenin (S33,37,41,45A). **B** MINK1 protein levels in HeLa cells after treatment with neddylation inhibitor MLN4924 [3  $\mu$ M] as measured by WB. Shown are relative mean signals normalized to DMSO-treated samples with SD from three independent experiments. Significance determined by one-way ANOVA, \*\*: p value < 0.01. **C** Anti-MINK1 immunofluorescence signal in fixed U2OS SEC-C parental and MINK1 knock-out cells. Scale bars: 10  $\mu$ m. **D** Confirmation of tagged MINK1 expression in mNeonGreen-MINK1 HeLa SEC-C cells (left) and successful knock-out of MINK1 in U2OS SEC-C MINK1-KO clones #16, #22, and #26 (right). The MINK1 antibody used for IF in C (MINK1 (IF AB)), recognizes protein bands of similar molecular weights to MINK1 in U2OS SEC-C parental and MINK1-KO cells. **E** Doxycycline-inducible overexpression of MINK1-GFP and GFP, respectively, in stable U2OS Flp-In<sup>TM</sup>T-REx<sup>TM</sup> cell lines. **F** MINK1 and  $\beta$ -catenin protein levels in Colo320 cells 72 h after transfection with control or APC siRNA.
